# Supplementary material for: Prevalence, Severity of Extension, and Risk Factors of Gingivitis in a 3-Month Pregnant Population: A Multicenter Cross-Sectional Study
Source: MDPI journal article supplement (doi:10.3390/jcm12093349), 2023-05-08
Supplement: s1 [file s1]

Table S1. STROBE checklist

|                              | Item No | Recommendation                                                                                                                                                                       | Page No. |
|------------------------------|---------|--------------------------------------------------------------------------------------------------------------------------------------------------------------------------------------|----------|
| Title and abstract           | 1       | (a) Indicate the study’s design with a commonly used term in the title or the abstract                                                                                               | 1        |
|                              |         | (b) Provide in the abstract an informative and balanced summary of what was done and what was found                                                                                  | 1        |
| Introduction                 |         |                                                                                                                                                                                      |          |
| Background/rationale         | 2       | Explain the scientific background and rationale for the investigation being reported                                                                                                 | 1-2      |
| Objectives                   | 3       | State specific objectives, including any prespecified hypotheses                                                                                                                     | 2        |
| Methods                      |         |                                                                                                                                                                                      |          |
| Study design                 | 4       | Present key elements of study design early in the paper                                                                                                                              | 2        |
| Setting                      | 5       | Describe the setting, locations, and relevant dates, including periods of recruitment, exposure, follow-up, and data collection                                                      | 2-3      |
| Participants                 | 6       | (a) Cohort study—Give the eligibility criteria, and the sources and methods of selection of participants. Describe methods of follow-up                                              | 2-3      |
| Variables                    | 7       | Clearly define all outcomes, exposures, predictors, potential confounders, and effect modifiers. Give diagnostic criteria, if applicable                                             | 3        |
| Data sources/<br>measurement | 8*      | For each variable of interest, give sources of data and details of methods of assessment (measurement). Describe comparability of assessment methods if there is more than one group | 3-4      |
| Bias                         | 9       | Describe any efforts to address potential sources of bias                                                                                                                            | NA       |
| Study size                   | 10      | Explain how the study size was arrived at                                                                                                                                            | 2        |
| Quantitative<br>variables    | 11      | Explain how quantitative variables were handled in the analyses. If applicable, describe which groupings were chosen and why                                                         | 4        |
| Statistical methods          | 12      | (a) Describe all statistical methods, including those used to control for confounding                                                                                                | 4        |
|                              |         | (b) Describe any methods used to examine subgroups and interactions                                                                                                                  | 4        |
|                              |         | (c) Explain how missing data were addressed                                                                                                                                          | NA       |
|                              |         | (d) Cohort study—If applicable, explain how loss to follow-up was addressed                                                                                                          | NA       |
|                              |         | (e) Describe any sensitivity analyses                                                                                                                                                | NA       |

|                          |     |                                                                                                                                                                                                              |       |
|--------------------------|-----|--------------------------------------------------------------------------------------------------------------------------------------------------------------------------------------------------------------|-------|
| Participants             | 13* | (a) Report numbers of individuals at each stage of study—eg numbers potentially eligible, examined for eligibility, confirmed eligible, included in the study, completing follow-up, and analysed            | 5     |
|                          |     | (b) Give reasons for non-participation at each stage                                                                                                                                                         | 5     |
|                          |     | (c) Consider use of a flow diagram                                                                                                                                                                           | 5     |
| Descriptive data         | 14* | (a) Give characteristics of study participants (eg demographic, clinical, social) and information on exposures and potential confounders                                                                     | 6     |
|                          |     | (b) Indicate number of participants with missing data for each variable of interest                                                                                                                          | NA    |
|                          |     | (c) <i>Cohort study</i> —Summarise follow-up time (eg, average and total amount)                                                                                                                             | NA    |
| Outcome data             | 15* | <i>Cohort study</i> —Report numbers of outcome events or summary measures over time                                                                                                                          | 7-12  |
| Main results             | 16  | (a) Give unadjusted estimates and, if applicable, confounder-adjusted estimates and their precision (eg, 95% confidence interval). Make clear which confounders were adjusted for and why they were included | 7-12  |
|                          |     | (b) Report category boundaries when continuous variables were categorized                                                                                                                                    | 7-12  |
|                          |     | (c) If relevant, consider translating estimates of relative risk into absolute risk for a meaningful time period                                                                                             | NA    |
| Other analyses           | 17  | Report other analyses done—eg analyses of subgroups and interactions, and sensitivity analyses                                                                                                               | 7-12  |
| <b>Discussion</b>        |     |                                                                                                                                                                                                              |       |
| Key results              | 18  | Summarise key results with reference to study objectives                                                                                                                                                     | 12-14 |
| Limitations              | 19  | Discuss limitations of the study, taking into account sources of potential bias or imprecision. Discuss both direction and magnitude of any potential bias                                                   | 14    |
| Interpretation           | 20  | Give a cautious overall interpretation of results considering objectives, limitations, multiplicity of analyses, results from similar studies, and other relevant evidence                                   | 12-14 |
| Generalisability         | 21  | Discuss the generalisability (external validity) of the study results                                                                                                                                        | 12-14 |
| <b>Other information</b> |     |                                                                                                                                                                                                              |       |
| Funding                  | 22  | Give the source of funding and the role of the funders for the present study and, if applicable, for the original study on which the present article is based                                                | 15    |

\*Give information separately for cases and controls in case-control studies and, if applicable, for exposed and unexposed groups in cohort and cross-sectional studies.
